# Supplementary material
Source: PubMed Central journal article supplement (PMC3188885)

**Supplementary Table 1:** List of the primers used in the study. m:mouse; h: human.

|    | Gene             | Direction | Sequence (5' to 3')        |
|----|------------------|-----------|----------------------------|
| 1  | mVCAM-1          | S         | AGTTGGGGATTTCGGTTGTTCT     |
|    |                  | AS        | CCCCTCATTCTTACCACCC        |
| 2  | mICAM-1          | S         | TCCTAAAATGACCTGCAGACG      |
|    |                  | AS        | AGTTTTATGGCCTCCTCCTGA      |
| 3  | mTNF- $\alpha$   | S         | CATCTTCTCAAATTCGAGTGACAA   |
|    |                  | AS        | TGGGAGTAGACAAGGTACAACCC    |
| 4  | mMCP-1           | S         | ACTGAAGCCAGCTCTCTTCTCCTC   |
|    |                  | AS        | TTTCCTTCTTGGGGTCAGCACAGAC  |
| 5  | mMIP-2           | S         | CACTCTCAAGGGCGGTCAAA       |
|    |                  | AS        | TACGATCCAGGCTTCCCAGGT      |
| 6  | mMIP-1 $\alpha$  | S         | ACCACTGCCCTTGCTGTTC        |
|    |                  | AS        | TCTGCCGGTTTCTCTTAGTCAG     |
| 7  | mKC              | S         | CGCTGCTGCTGCTGGCCACCA      |
|    |                  | AS        | GGCTATGACTTCGTTTGGGTGCAG   |
| 8  | mCXCR2           | S         | GGCGGGGTAAGACAAGAATC       |
|    |                  | AS        | GGCAAGGTCAGGGCAAAGAA       |
| 9  | m $\beta$ -actin | S         | ACCGTGAAAAGATGACCCAGATC    |
|    |                  | AS        | TAGTTTCATGGATGCCACAGG      |
| 10 | hVCAM-1          | S         | CCAATGGGGGAGATAGACCT       |
|    |                  | AS        | ACCGCAAACCCAGTTAAAAA       |
| 11 | hBRCA1           | S         | GGCTATCCTCTCAGAGTGACATTTTA |
|    |                  | AS        | GCTTTATCAGGTTATGTTGCATGGT  |
| 12 | h $\beta$ -actin | S         | CTACCTCATGAAGATCCTCACCGA   |
|    |                  | AS        | TTCTCCTTAATGTCACGCACGATT   |

“m” and “h”: designation for primers for mouse and human genes, respectively.

**Supplementary Methods:**

*Isolation of smooth muscle cells:* Smooth muscle cells were isolated by enzymatic digestion of lungs collected from 6 week-old C57Bl/6 PARP-1<sup>-/-</sup> mice using standard protocols. Briefly, lung were then chopped into small pieces and placed into a 15 ml conical tube containing the collagenase solution supplemented with 0.2 mg/ml pancreatic elastase (Sigma-Aldrich, Saint Louis, MO) and incubate at 37 ° C for approximately 3 hours with gentle agitation. Cell suspension was then centrifuged for 5 min at 1500 RPM. The pellets were carefully resuspended in DMEM supplemented with FBS and antibiotics. Cells were then washed two times and finally plated into tissue culture flasks. Cells were used at passage 3 to 4.

**Figure S1:** Profiles of the different amplicons generated by real-time PCR using the primers depicted in supplementary Table 1. Note the single band and single peak of each amplicon suggestive of the quality of the reactions.

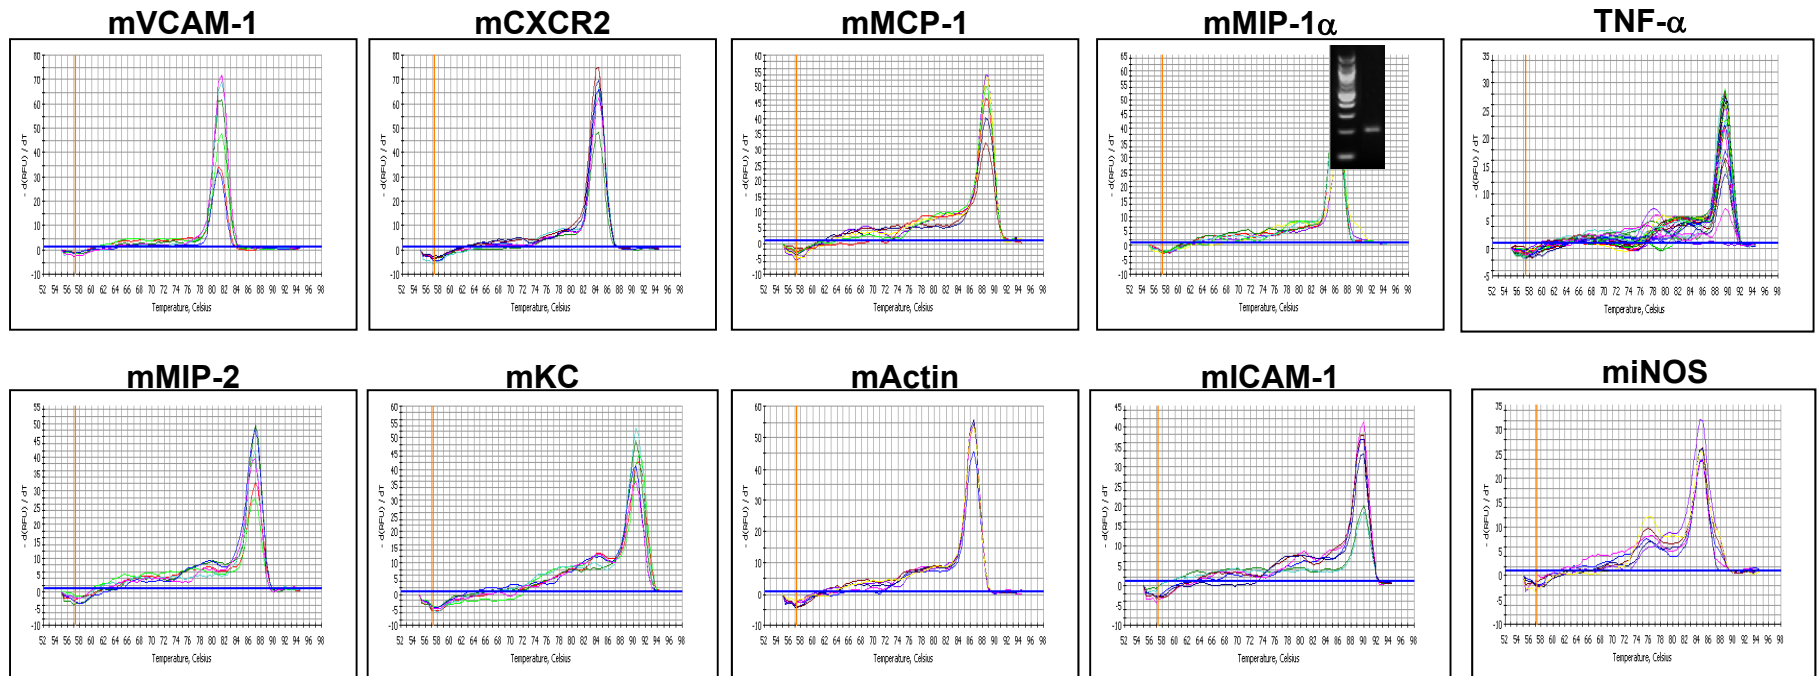

doi: 10.3119/molmed.2011.00032 [www.molmed.org](http://www.molmed.org)  
**Supplementary Figure S2:** Effect of PARP inhibitors on TNF- $\alpha$ -induced nuclear translocation of p65 NF- $\kappa$ B. A549 cells were treated with TNF- $\alpha$  for the indicated time intervals in the absence or the presence of the PARP inhibitor NU1025 or TIQ-A. Cells were then fixed then subjected to immunofluorescence with antibodies to p65 NF- $\kappa$ B.

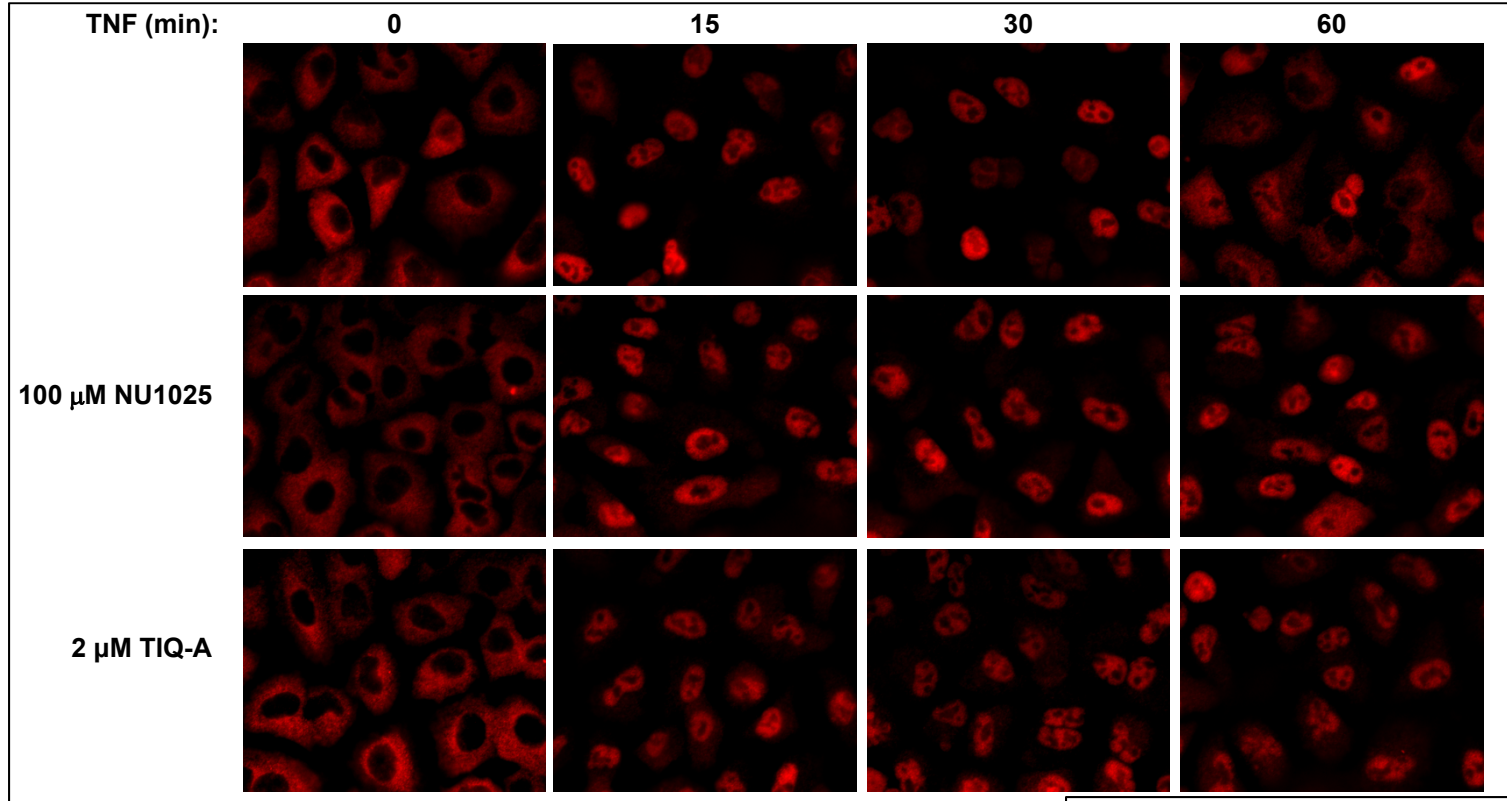

**Supplementary Figure S3:** Lack of a toxic effect of cordycepin on treated primary smooth muscle cells. Cells were treated with different doses of cordycepin for 24 h, after which culture media were collected and assessed for LDH activity. LDH activity is expressed as percent of the value detected in media of untreated cells. No significant difference in LDH activity was observed between the different doses and control.

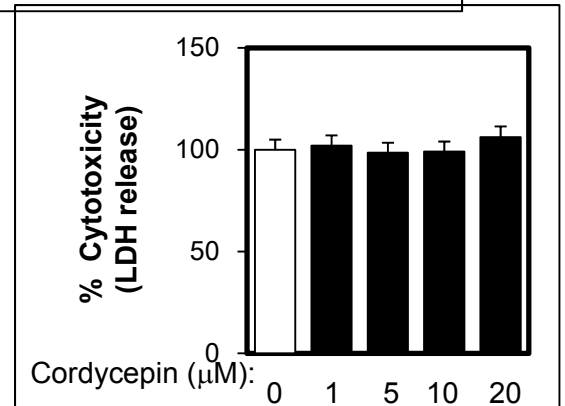

Supplement: 11_32_Kim_Suppl.pdf [file 11_32_Kim_Suppl.pdf]
